# Supplementary material for: Duration of SARS-CoV-2 shedding: A population-based, Canadian study
Source: PLOS journal article supplement (doi:10.1371/journal.pone.0252217), 2021-06-17

S1 Appendix. Positive test rates over time after initial positive test (95% error bars)

A. Overall study population

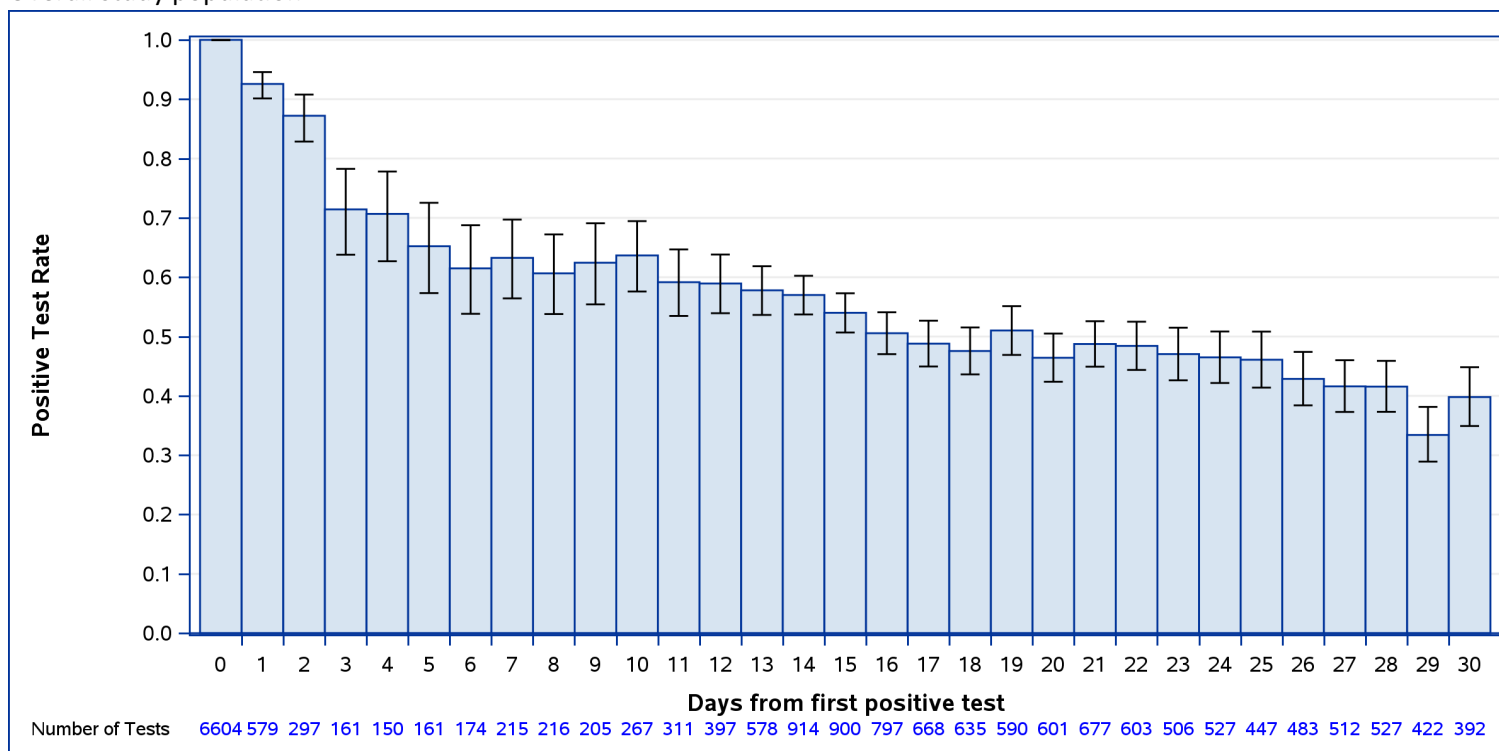

B. Documented shedding group

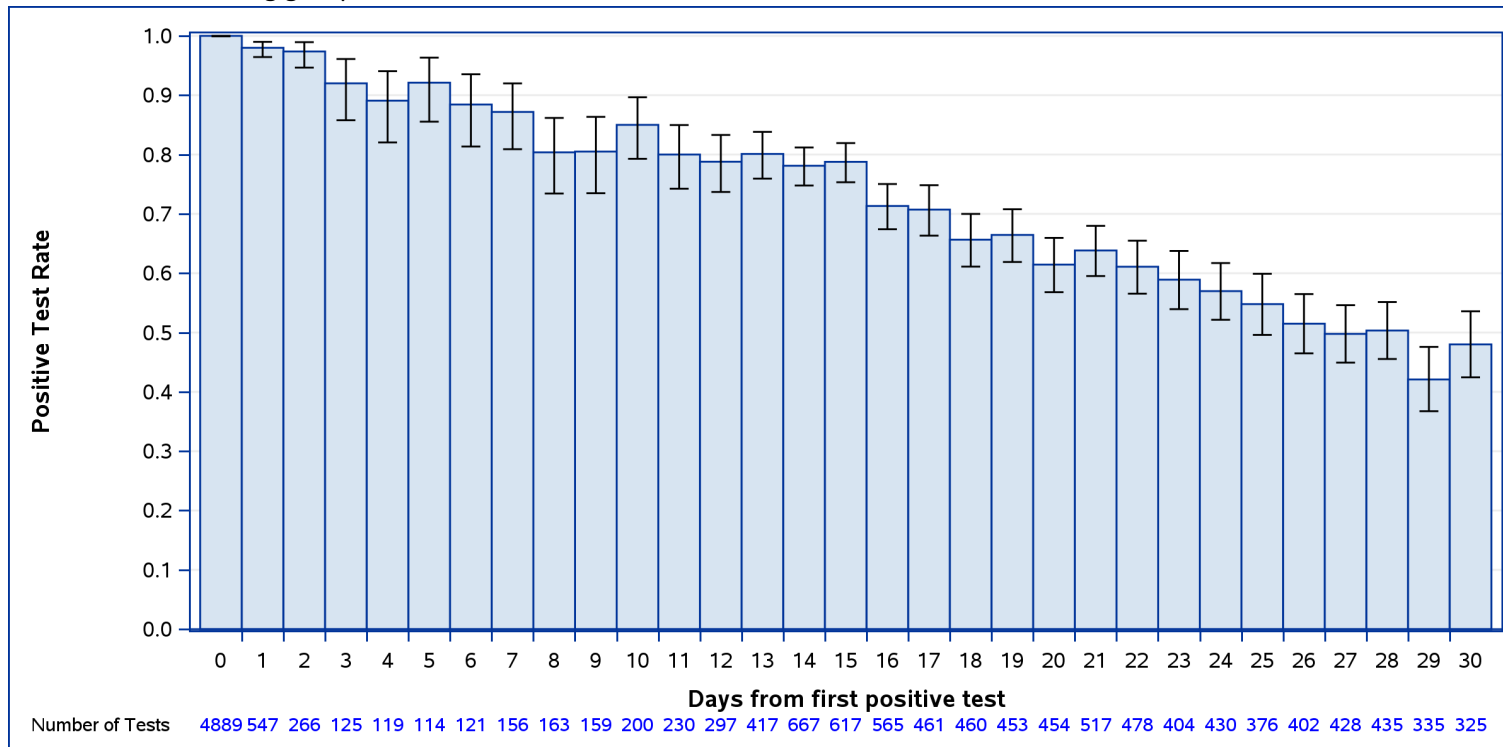

C. Documented resolution group

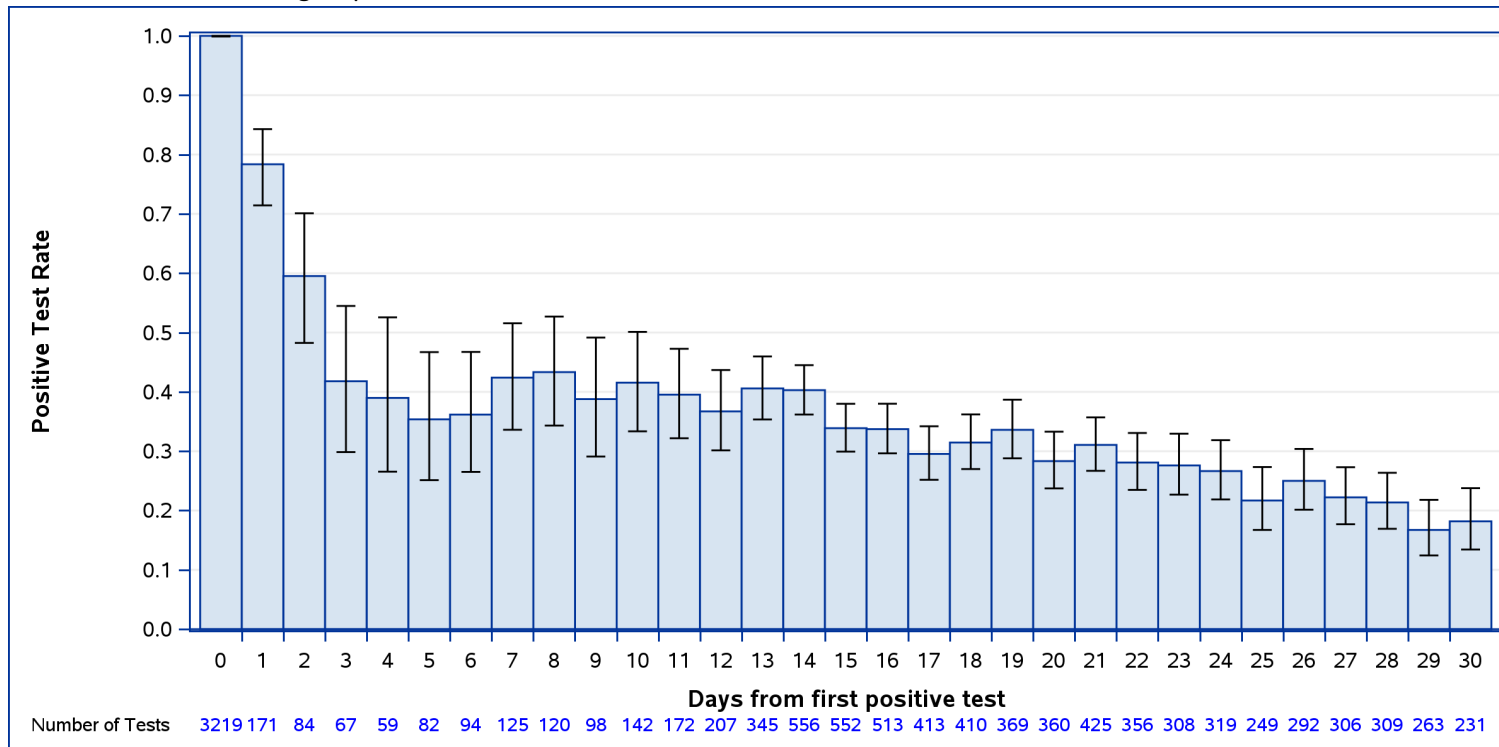

Supplement: S1 (10.1371/journal.pone.0252217.s001) [file journal.pone.0252217.s001]
